# Supplementary material
Source: Springer Nature journal article supplement (https://www.springermedizin.de/resource/supplementary/12874_2009_435_MOESM3_ESM.pdf/9432092)

Hazard of alive rural hospital discharge

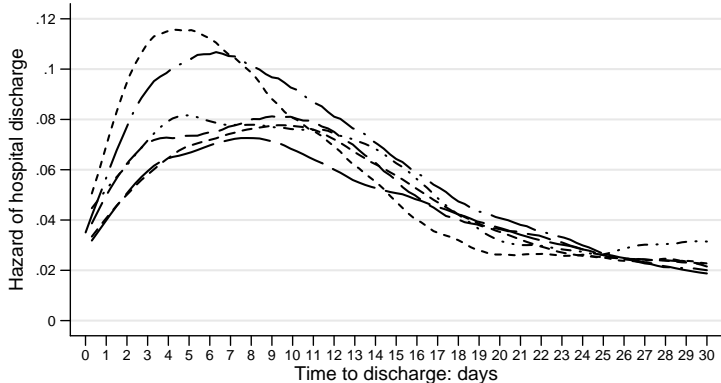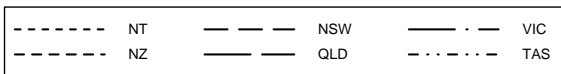

Hazard of alive metropolitan hospital discharge

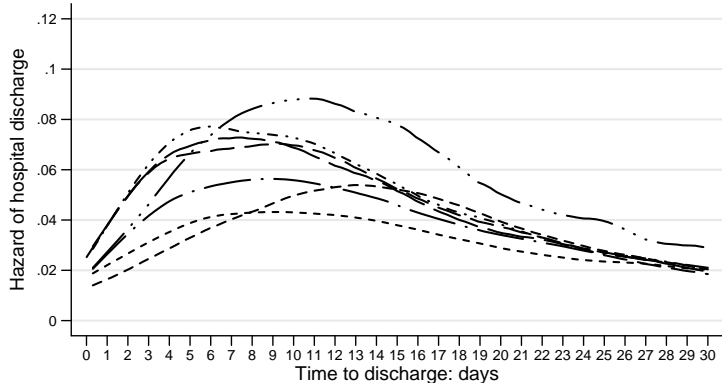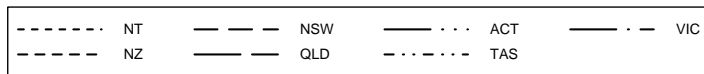

Hazard of alive tertiary hospital discharge

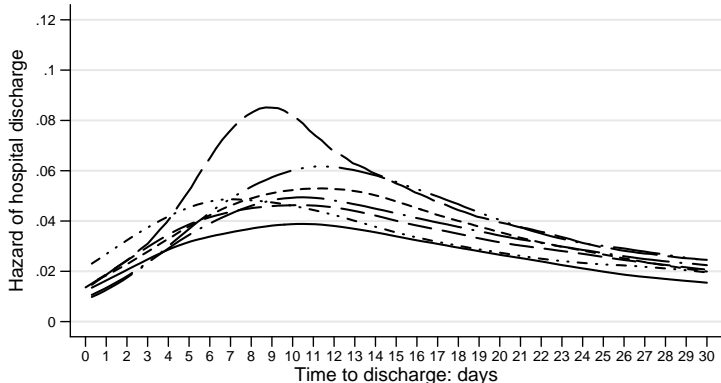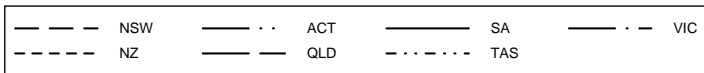

Hazard of alive private hospital discharge

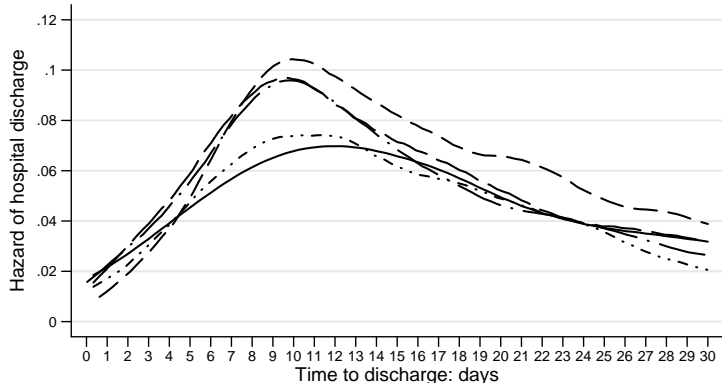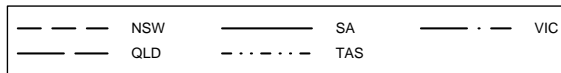

Supplement: MOESM3 [file 9432092]
